# Supplementary material for: Glycemic traits and Alzheimer’s disease: a Mendelian randomization study
Source: Aging (Albany NY). 2020 Nov 16;12(22):22688–99. doi: 10.18632/aging.103887 (PMC7746331; doi:10.18632/aging.103887)
Supplement: Supplementary Table 1 [file aging-12-103887-s002..pdf]

## SUPPLEMENTARY TABLE

**Supplementary Table 1. SNPs associated with other diseases or traits at genome-wide significance level ( $P < 5.0 \times 10^{-8}$ ).**

| Glycemic traits | SNP        | Associated other diseases or traits                                                      |
|-----------------|------------|------------------------------------------------------------------------------------------|
| T2D             | rs10203174 | Lymphocyte percentage of white cells, lymphocyte count                                   |
| T2D             | rs13389219 | Waist hip ratio, triglycerides, body mass index                                          |
| T2D             | rs2943640  | HDL cholesterol, triglycerides                                                           |
| T2D             | rs7202877  | Coronary artery disease                                                                  |
| T2D             | rs10401969 | Total cholesterol, triglycerides, LDL cholesterol                                        |
| T2D             | rs9271774  | White blood cell count, lymphocyte count, neutrophil count                               |
| T2D             | rs635634   | LDL cholesterol, total cholesterol, white blood cell count                               |
| T2D             | rs2925979  | HDL cholesterol, adiponectin, self-reported hypertension                                 |
| FG              | rs983309   | Inflammation, total cholesterol, HDL cholesterol                                         |
| FG              | rs3829109  | Neutrophil count, white blood cell count, granulocyte count                              |
| FG              | rs9368222  | Self-reported hypertension                                                               |
| FG              | rs11715915 | Years of educational attainment                                                          |
| FG              | rs17762454 | Serum urate, white blood cell count                                                      |
| FG              | rs780094   | Triglycerides, serum urate, white blood cell count, C reactive protein                   |
| FG              | rs7944584  | Self-reported hypertension                                                               |
| FG              | rs174550   | Triglycerides, LDL cholesterol                                                           |
| HbA1c           | rs7616006  | Lymphocyte count, monocyte count, total cholesterol, LDL cholesterol                     |
| HbA1c           | rs9818758  | Years of educational attainment                                                          |
| HbA1c           | rs1800562  | Self-reported hypertension                                                               |
| HbA1c           | rs592423   | Reticulocyte count, triglycerides, HDL cholesterol                                       |
| HbA1c           | rs579459   | LDL cholesterol, total cholesterol, interleukin 6, coronary artery disease               |
| HbA1c           | rs10774625 | Lymphocyte count, self-reported hypertension, coronary artery disease, total cholesterol |
| HOMA- $\beta$   | rs174550   | Triglycerides, LDL cholesterol, HDL cholesterol, white blood cell count                  |

SNP, single nucleotide polymorphism; T2D, type 2 diabetes; FG, fasting glucose; HbA1c, hemoglobin A1c; HOMA- $\beta$ , homeostasis model assessment - $\beta$ -cell function; LDL, low density lipoprotein; HDL, high density lipoprotein.
