# Supplementary material for: Glycemic traits and Alzheimer’s disease: a Mendelian randomization study
Source: Aging (Albany NY). 2020 Nov 16;12(22):22688–99. doi: 10.18632/aging.103887 (PMC7746331; doi:10.18632/aging.103887)
Supplement: Supplementary Table 2 [file aging-12-103887-s003..xlsx]

## Sheet: Sheet1
Supplementary Table 2. Characteristics of the SNPs associated with glycemic traits.
Glycemic traits	SNP	Prioritized genes	Position (hg19)	EA/OA	EAF	Effect on glycemic traits						Effect on AD
						Beta	SE	P value			Beta		SE	P value
T2D	rs2075423	PROX1	chr1:212221342	G/T	0.62	0.0677	0.0119	8.1×10-9			-0.0377		0.0167	0.024
T2D	rs243088	BCL11A	chr2:60422249	T/A	0.45	0.0677	0.012	1.8×10-8			-0.0008		0.0156	0.96
T2D	rs1801282	PPARG	chr3:12368125	C/G	0.86	0.1222	0.0181	1.1×10-12			0.0281		0.0237	0.237
T2D	rs1496653	UBE2E2	chr3:23429794	A/G	0.75	0.0862	0.014	3.6×10-9			-0.0041		0.0193	0.833
T2D	rs6795735	ADAMTS9	chr3:64680405	C/T	0.59	0.077	0.0118	7.4×10-11			0.0176		0.0162	0.276
T2D	rs11717195	ADCY5	chr3:124565088	T/C	0.77	0.1044	0.0138	6.5×10-14			0.0313		0.0185	0.091
T2D	rs4402960	IGF2BP2	chr3:186994381	T/G	0.33	0.1222	0.0135	2.4×10-23			0.0144		0.0171	0.398
T2D	rs4458523	WFS1	chr4:6340887	G/T	0.57	0.0953	0.0117	2.0×10-15			0.0268		0.0159	0.092
T2D	rs459193	ANKRD55	chr5:55842508	G/A	0.7	0.077	0.0142	6.0×10-9			-0.0007		0.0185	0.968
T2D	rs6878122	ZBED3	chr5:76463067	G/A	0.28	0.0953	0.0139	5.0×10-11			-0.0019		0.0176	0.914
T2D	rs7756992	CDKAL1	chr6:20787688	G/A	0.29	0.157	0.0131	7.0×10-35			-0.0078		0.0171	0.65
T2D	rs17168486	DGKB	chr7:14864807	T/C	0.19	0.1044	0.0162	5.9×10-11			-0.0254		0.0215	0.236
T2D	rs849135	JAZF1	chr7:28162938	G/A	0.52	0.1044	0.0115	3.1×10-17			-0.0418		0.0155	0.007
T2D	rs516946	ANK1	chr8:41638405	C/T	0.76	0.0862	0.014	2.5×10-10			-0.0122		0.0179	0.496
T2D	rs3802177	SLC30A8	chr8:118254206	G/A	0.66	0.131	0.0134	1.3×10-21			0.0334		0.0171	0.051
T2D	rs10811661	CDKN2A/B	chr9:22124094	T/C	0.82	0.1655	0.0151	3.7×10-27			-0.0059		0.0207	0.776
T2D	rs2796441	TLE1	chr9:83498768	G/A	0.57	0.0677	0.0119	5.4×10-9			-0.014		0.017	0.411
T2D	rs12571751	ZMIZ1	chr10:80612637	A/G	0.52	0.077	0.0119	1.0×10-10			0.0331		0.016	0.038
T2D	rs1111875	HHEX/IDE	chr10:94452862	C/T	0.58	0.1044	0.0114	2.0×10-19			0.001		0.0167	0.952
T2D	rs7903146	TCF7L2	chr10:114748339	T/C	0.27	0.3293	0.0129	1.2×10-139			-0.0054		0.0173	0.753
T2D	rs163184	KCNQ1	chr11:2803645	G/T	0.5	0.0862	0.0118	1.2×10-11			0.0186		0.0159	0.243
T2D	rs5215	KCNJ11	chr11:17365206	C/T	0.41	0.0677	0.0119	8.5×10-10			0.0291		0.0165	0.078
T2D	rs1552224	ARAP1 (CENTD2)	chr11:72110746	A/C	0.81	0.1044	0.0162	1.8×10-10			-0.005		0.0218	0.817
T2D	rs10830963	MTNR1B	chr11:92348358	G/C	0.31	0.0953	0.0139	5.3×10-13			0.0146		0.0193	0.447
T2D	rs10842994	KLHDC5	chr12:27856417	C/T	0.8	0.0953	0.0163	6.1×10-10			0.0191		0.0206	0.354
T2D	rs2261181	HMGA2	chr12:64498585	T/C	0.1	0.1222	0.0204	1.2×10-9			-0.0287		0.0258	0.266
T2D	rs7955901	TSPAN8/LGR5	chr12:69719560	C/T	0.45	0.0677	0.0119	6.5×10-9			-0.014		0.0159	0.379
T2D	rs1359790	SPRY2	chr13:79615157	G/A	0.72	0.077	0.0119	1.4×10-8			-0.0004		0.0178	0.98
T2D	rs7177055	HMG20A	chr15:75619817	A/G	0.68	0.077	0.0119	4.6×10-9			-0.0129		0.017	0.446
T2D	rs12899811	PRC1	chr15:89345080	G/A	0.31	0.077	0.0119	6.3×10-9			0.0213		0.0165	0.198
T2D	rs9936385	FTO	chr16:52376670	C/T	0.41	0.1222	0.0135	2.6×10-23			0.0057		0.0159	0.718
T2D	rs11651052	HNF1B (TCF2)	chr17:33176494	A/G	0.44	0.0953	0.0162	2.0×10-11			0.0057		0.017	0.737
T2D	rs12970134	MC4R	chr18:56035730	A/G	0.27	0.077	0.0142	1.2×10-8			-0.0352		0.0175	0.044
T2D	rs60780116	ACSL1	chr4:185708807	T/C	0.84	0.0862	0.014	2.0×10-10			-0.0332		0.0249	0.181
T2D	rs6918311	SLC35D3	chr6:137287702	A/G	0.53	0.0583	0.0096	6.8×10-9			0.0211		0.0158	0.183
T2D	rs1182436	MNX1	chr7:157027753	C/T	0.8	0.077	0.0119	1.7×10-8			-0.0134		0.0214	0.533
T2D	rs2292626	PLEKHA1	chr10:124186714	C/T	0.5	0.0677	0.0095	1.5×10-13			0.0492		0.0154	0.001
T2D	rs1061810	HSD17B12	chr11:43877934	A/C	0.28	0.0677	0.0095	4.0×10-10			0.0102		0.0174	0.559
T2D	rs111669836	MAP3K11	chr11:65364385	A/T	0.25	0.0583	0.012	4.1×10-8			0.0227		0.019	0.233
T2D	rs10146997	NRXN3	chr14:79945162	G/A	0.21	0.0677	0.0095	2.3×10-9			0.0033		0.0189	0.863
T2D	rs7224685	ZZEF1	chr17:4014384	T/G	0.3	0.0677	0.0095	3.2×10-10			-0.0256		0.0174	0.142
T2D	rs78761021	GLP2R	chr17:9780387	G/A	0.34	0.0583	0.0096	3.0×10-8			-0.0309		0.0172	0.072
T2D	rs15563	GIP	chr17:47005193	G/A	0.51	0.0583	0.0121	4.4×10-8			-0.0016		0.0154	0.916
FG	rs10811661	CDKN2B	chr9:22124094	T/C	0.82	0.0238	0.0028	5.6×10-18			-0.0059		0.0207	0.776
FG	rs4869272	PCSK1	chr5:95565204	T/C	0.69	0.0177	0.0022	1.0×10-15			0.0072		0.0171	0.673
FG	rs11619319	PDX1	chr13:27385599	G/A	0.23	0.0195	0.0024	1.3×10-15			-0.0149		0.0191	0.436
FG	rs6943153	GRB10	chr7:50759073	T/C	0.34	0.0154	0.0022	1.6×10-12			0.0032		0.0173	0.855
FG	rs11603334	ARAP1	chr11:72110633	G/A	0.83	0.0192	0.0028	1.1×10-11			-0.0008		0.0221	0.973
FG	rs6113722	FOXA2	chr20:22505099	G/A	0.96	0.0353	0.0053	2.5×10-11			0.0189		0.0387	0.626
FG	rs16913693	IKBKAP	chr9:110720180	T/G	0.97	0.0434	0.0066	3.5×10-11			-0.0487		0.0615	0.428
FG	rs3783347	WARS	chr14:99909014	G/T	0.79	0.0168	0.0026	1.3×10-10			0.0125		0.0188	0.506
FG	rs2302593	GIPR	chr19:50888474	C/G	0.5	0.0144	0.0023	9.3×10-10			-0.0582		0.0164	0
FG	rs10747083	P2RX2	chr12:131551691	A/G	0.66	0.0133	0.0023	7.6×10-9			0.0317		0.0207	0.126
FG	rs6072275	TOP1	chr20:39177319	A/G	0.16	0.0159	0.0028	1.7×10-8			0.0184		0.0216	0.393
FG	rs7651090	IGF2BP2	chr3:186996086	G/A	0.31	0.0128	0.0023	1.75×10-8			0.015		0.0166	0.365
FG	rs576674	KL	chr13:32452302	G/A	0.15	0.0167	0.003	2.3×10-8			0.0123		0.0208	0.554
FG	rs7708285	ZBED3	chr5:76461623	G/A	0.27	0.015	0.0026	1.2×10-8			0.0067		0.0176	0.706
FG	rs2657879	GLS2	chr12:55151605	G/A	0.18	0.0157	0.0029	3.9×10-8			0.0467		0.0207	0.024
FG	rs340874	PROX1	chr1:212225879	C/T	0.52	0.0135	0.0022	4.08×10-10			-0.0372		0.0161	0.021
FG	rs560887	G6PC2	chr2:169471394	C/T	0.7	0.0711	0.0025	0			0.0232		0.0174	0.182
FG	rs11708067	ADCY5	chr3:124548468	A/G	0.79	0.023	0.0026	1.30×10-18			0.0354		0.0189	0.061
FG	rs11920090	SLC2A2	chr3:172195984	T/C	0.86	0.0264	0.0031	8.56×10-18			-0.0381		0.0224	0.089
FG	rs2191349	DGKB/TMEM195	chr7:15030834	T/G	0.53	0.0292	0.0021	0			0.0186		0.0156	0.234
FG	rs4607517	GCK	chr7:44190246	A/G	0.16	0.0575	0.0029	0			0.0118		0.0202	0.558
FG	rs11558471	SLC30A8	chr8:118254914	A/G	0.68	0.0289	0.0023	7.80×10-37			0.0323		0.0171	0.059
FG	rs7867224	GLIS3	chr9:4282152	A/G	0.51	0.0134	0.0023	3.90×10-9			0.0137		0.0156	0.378
FG	rs10885122	ADRA2A	chr10:113032083	G/T	0.88	0.0274	0.0033	6.32×10-17			0.0059		0.0244	0.81
FG	rs4506565	TCF7L2	chr10:114746031	T/A	0.3	0.0206	0.0023	3.95×10-19			-0.008		0.0166	0.63
FG	rs11605924	CRY2	chr11:45829667	A/C	0.49	0.0202	0.0023	3.93×10-19			0.0428		0.0156	0.006
FG	rs10830963	MTNR1B	chr11:92348358	G/C	0.29	0.0779	0.0025	0			0.0146		0.0193	0.447
FG	rs11071657	VPS13C/C2CD4A/B	chr15:60222448	T/C	0.63	0.0103	0.0022	3.89×10-6			-0.0104		0.0165	0.529
FI	rs10195252	GRB14	chr2:165221337	T/C	0.6	0.0174	0.0021	1.3×10-16			0.0265		0.0162	0.102
FI	rs1167800	HIP1	chr7:75014132	A/G	0.54	0.0156	0.0026	2.6×10-9			-0.009		0.0163	0.58
FI	rs1421085	FTO	chr16:52358455	C/T	0.42	0.02	0.0025	1.9×10-15			-0.0005		0.0163	0.976
FI	rs1530559	YSK4	chr2:135472099	A/G	0.52	0.0145	0.0026	3.4×10-8			-0.0357		0.0191	0.062
FI	rs17036328	PPARG	chr3:12365484	T/C	0.86	0.0212	0.003	3.6×10-12			0.028		0.0244	0.251
FI	rs2126259	PPP1R3B	chr8:9222556	T/C	0.11	0.0238	0.0033	3.3×10-13			0.0054		0.0273	0.845
FI	rs2745353	RSPO3	chr6:127494628	T/C	0.51	0.0143	0.0025	5.5×10-9			0.0089		0.0156	0.568
FI	rs2943645	IRS1	chr2:226807424	T/C	0.63	0.0193	0.0021	2.3×10-19			0.0106		0.0164	0.52
FI	rs3822072	FAM13A	chr4:89960292	A/G	0.48	0.0116	0.0021	1.8×10-8			0.0096		0.0157	0.541
FI	rs459193	ANKRD55-MAP3K1	chr5:55842508	G/A	0.73	0.0147	0.0023	1.12×10-10			-0.0007		0.0185	0.968
FI	rs4846565	LYPLAL1	chr1:217788727	G/A	0.67	0.0132	0.0022	1.8×10-9			-0.0259		0.0166	0.119
FI	rs4865796	ARL15	chr5:53308421	A/G	0.67	0.0154	0.0022	2.1×10-8			0.0123		0.0167	0.464
FI	rs6822892	PDGFC	chr4:157954125	A/G	0.68	0.0138	0.0022	2.6×10-10			-0.0086		0.0162	0.598
FI	rs6912327	UHRF1BP1	chr6:34872900	T/C	0.8	0.0165	0.0029	2.3×10-8			-0.0059		0.0193	0.762
FI	rs731839	PEPD	chr19:38590905	G/A	0.34	0.0148	0.0021	5.1×10-12			0.0102		0.0168	0.543
FI	rs7903146	TCF7L2	chr10:114748339	C/T	0.72	0.0181	0.0028	6.1×10-11			0.0054		0.0173	0.753
FI	rs974801	TET2	chr4:106290513	G/A	0.38	0.0139	0.0021	3.3×10-11			0.0141		0.0158	0.372
FI	rs780094	GCKR	chr2:27594741	C/T	0.61	0.0193	0.0021	7.37×10-20			0.0027		0.0161	0.867
FI	rs860598	IGF1	chr12:101422576	A/G	0.83	0.0152	0.0027	1.46×10-8			0.0111		0.0207	0.594
HbA1c	rs267738	LASS2_CERS2	chr1:150940625	T/G	0.77	0.0111	0.0019	2.6×10-9			0.0331		0.0196	0.092
HbA1c	rs857691	SPTA1	chr1:158626378	T/C	0.27	0.0193	0.0019	4.0×10-25			0.0037		0.0185	0.842
HbA1c	rs17509001	ATAD2B	chr2:24021231	C/T	0.16	0.0181	0.0023	1.9×10-15			-0.013		0.0232	0.575
HbA1c	rs560887	G6PC2_b	chr2:169763148	C/T	0.68	0.0284	0.0018	1.5×10-58			0.0232		0.0174	0.182
HbA1c	rs11708067	ADCY5	chr3:123065778	A/G	0.75	0.0132	0.0019	1.4×10-12			0.0354		0.0189	0.061
HbA1c	rs8192675	SLC2A2	chr3:170724883	T/C	0.69	0.0112	0.0017	1.4×10-11			-0.0202		0.0175	0.248
HbA1c	rs13134327	FREM3	chr4:144659795	A/G	0.33	0.0131	0.0017	2.6×10-15			-0.0015		0.0167	0.93
HbA1c	rs7756992	CDKAL1	chr6:20679709	G/A	0.29	0.0123	0.0018	2.8×10-12			-0.0078		0.0171	0.65
HbA1c	rs198846	HIST1H4A	chr6:26107463	G/A	0.83	0.0218	0.0022	1.2×10-23			0.0343		0.0211	0.104
HbA1c	rs11964178	C6orf183	chr6:109562035	A/G	0.57	0.0096	0.0016	6.4×10-10			-0.0264		0.0157	0.093
HbA1c	rs9494142	HBS1L_MYB	chr6:135431640	T/C	0.74	0.0205	0.0024	7.5×10-18			-0.0045		0.0184	0.804
HbA1c	rs4607517	YKT6_GCK_b	chr7:44235668	A/G	0.2	0.0306	0.0024	8.8×10-38			0.0118		0.0202	0.558
HbA1c	rs3824065	GCK	chr7:44213783	C/T	0.56	0.0192	0.0016	4.2×10-35			-0.0052		0.0161	0.748
HbA1c	rs6474359	ANK1_b	chr8:41500000	T/C	0.95	0.0436	0.0053	1.5×10-16			-0.0478		0.0506	0.345
HbA1c	rs4737009	ANK1_a	chr8:41630405	A/G	0.25	0.0212	0.002	4.5×10-27			0.0219		0.0192	0.255
HbA1c	rs6980507	SLC20A2	chr8:42383084	A/G	0.4	0.0097	0.0018	3.6×10-8			-0.0414		0.016	0.01
HbA1c	rs11558471	SLC30A8	chr8:118185733	A/G	0.67	0.015	0.0017	1.4×10-19			0.0323		0.0171	0.059
HbA1c	rs2383208	MTAP	chr9:22132076	A/G	0.8	0.0142	0.0021	7.0×10-12			-0.0102		0.0199	0.607
HbA1c	rs7040409	C9orf47	chr9:91503236	C/G	0.9	0.0284	0.0037	2.6×10-14			-0.036		0.033	0.276
HbA1c	rs4745982	HK1_b	chr10:71089843	T/G	0.87	0.0954	0.0056	2.9×10-65			0.0022		0.0381	0.953
HbA1c	rs10823343	HK1	chr10:70761019	A/G	0.72	0.0325	0.0021	1.7×10-55			-0.0175		0.0183	0.338
HbA1c	rs17747324	TCF7L2	chr10:114752503	C/T	0.25	0.0149	0.0023	6.1×10-11			-0.0412		0.0193	0.032
HbA1c	rs3782123	BET1L	chr11:205198	C/A	0.32	0.0126	0.002	1.5×10-10			0.0072		0.0174	0.681
HbA1c	rs11603334	ARAP1	chr11:72432985	G/A	0.82	0.012	0.0021	6.9×10-9			-0.0008		0.0221	0.973
HbA1c	rs10830963	MTNR1B	chr11:92708710	G/C	0.29	0.0196	0.002	2.2×10-23			0.0146		0.0193	0.447
HbA1c	rs2110073	PHB2	chr12:7075882	T/C	0.11	0.0153	0.0028	4.4×10-8			-0.0364		0.0295	0.218
HbA1c	rs2408955	SENP1	chr12:48499131	T/G	0.5	0.0124	0.0016	1.4×10-15			0.0166		0.0165	0.316
HbA1c	rs282587	ATP11A	chr13:113351662	G/A	0.15	0.019	0.0027	1.7×10-12			0.0029		0.0236	0.901
HbA1c	rs9604573	GAS6	chr13:114542858	T/C	0.27	0.0101	0.0018	9.6×10-9			-0.0051		0.0181	0.78
HbA1c	rs11248914	ITFG3	chr16:293562	T/C	0.65	0.0142	0.0019	2.6×10-14			-0.0146		0.0167	0.383
HbA1c	rs1558902	FTO	chr16:53803574	A/T	0.41	0.0103	0.0019	3.3×10-8			0.003		0.016	0.851
HbA1c	rs837763	CDT1	chr16:88853729	T/C	0.55	0.0172	0.0016	1.7×10-28			-0.0296		0.0168	0.077
HbA1c	rs9914988	ERAL1	chr17:27183104	A/G	0.79	0.0131	0.002	2.8×10-11			-0.0165		0.0192	0.391
HbA1c	rs1046896	FN3KRP	chr17:80685533	T/C	0.32	0.028	0.0017	4.5×10-64			-0.0122		0.0182	0.502
HbA1c	rs17533903	MYO9B	chr19:17256523	A/G	0.24	0.015	0.0022	5.3×10-12			0.0227		0.0205	0.267
HbA1c	rs4820268	TMPRSS6	chr22:37469591	G/A	0.46	0.0162	0.0017	1.4×10-22			0.0067		0.0156	0.669
HOMA-β	rs560887	G6PC2	chr2:169763148	C/T	0.67	-0.04	0.0036	7.67×10-29			0.0232		0.0174	0.182
HOMA-β	rs10830963	MTNR1B	chr11:92708710	G/C	0.7	-0.039	0.004	8.60×10-23			0.0146		0.0193	0.447
HOMA-β	rs4607517	GCK	chr7:44235668	A/G	0.2	-0.025	0.0046	4.84×10-8			0.0118		0.0202	0.558
HOMA-β	rs2191349	DGKB-TMEM195	chr7:15064309	T/G	0.47	-0.021	0.0033	5.04×10-11			0.0186		0.0156	0.234
HOMA-β	rs11708067	ADCY5	chr3:123065778	A/G	0.23	-0.016	0.0043	1.77×10-4			0.0354		0.0189	0.061
HOMA-β	rs7034200	GLIS3	chr9:4289050	A/C	0.48	-0.016	0.0033	1.67×10-6			0.0138		0.0154	0.37
HOMA-IR	rs780094	GCKR	chr2:27741237	T/C	0.39	-0.02	0.0041	7.63×10-7			-0.0027		0.0161	0.867
HOMA-IR	rs35767	IGF1	chr12:102875569	A/G	0.12	-0.029	0.0054	7.57×10-8			-0.0049		0.0212	0.818
Trait values for fasting insulin, HOMA-β and HOMA-IR were naturally log transformed. SNP, single nucleotide polymorphism; EA, effect allele; OA, other allele; EAF, effect allele frequency; AD, Alzheimer’s disease; SE, standard error; T2D, type 2 diabetes; FG, fasting glucose; FI, fasting insulin; HbA1c, hemoglobin A1c; HOMA-β, homeostasis model assessment -β-cell function; HOMA-IR, homeostasis mo…
